# Supplementary material for: Synthesis of carbohydrate polymer encrusted gold nanoparticles using bacterial exopolysaccharide: a novel and greener approach
Source: Royal Society of Chemistry journal article supplement (doi:10.1039/c4ra01428f), 2014-01-01

ELECTRONIC SUPPLEMENTARY INFORMATION

**Synthesis of carbohydrate polymer encrusted gold nanoparticles using bacterial  
exopolysaccharide: A novel and greener approach**

Ganesan Sathiyarayanan<sup>a</sup>, Venkatasamy Vignesh<sup>b</sup>, Ganesan Saibaba<sup>c</sup>, Annadurai  
Vinothkanna<sup>d</sup>, Krishnamoorthy Dineshkumar<sup>e</sup>, Madepalli Byrappagowdu Viswanathan<sup>a</sup>,  
Joseph Selvin<sup>f\*</sup>

**Fig. S1** 3-D surface graphs obtained from CCD statistical optimization. a) Interaction between Sucrose (A) and NH<sub>4</sub>Cl (B); b) Interaction between NH<sub>4</sub>Cl (B) and K<sub>2</sub>HPO<sub>4</sub> (C); c) Interaction between NH<sub>4</sub>Cl (B) and NaCl (D).

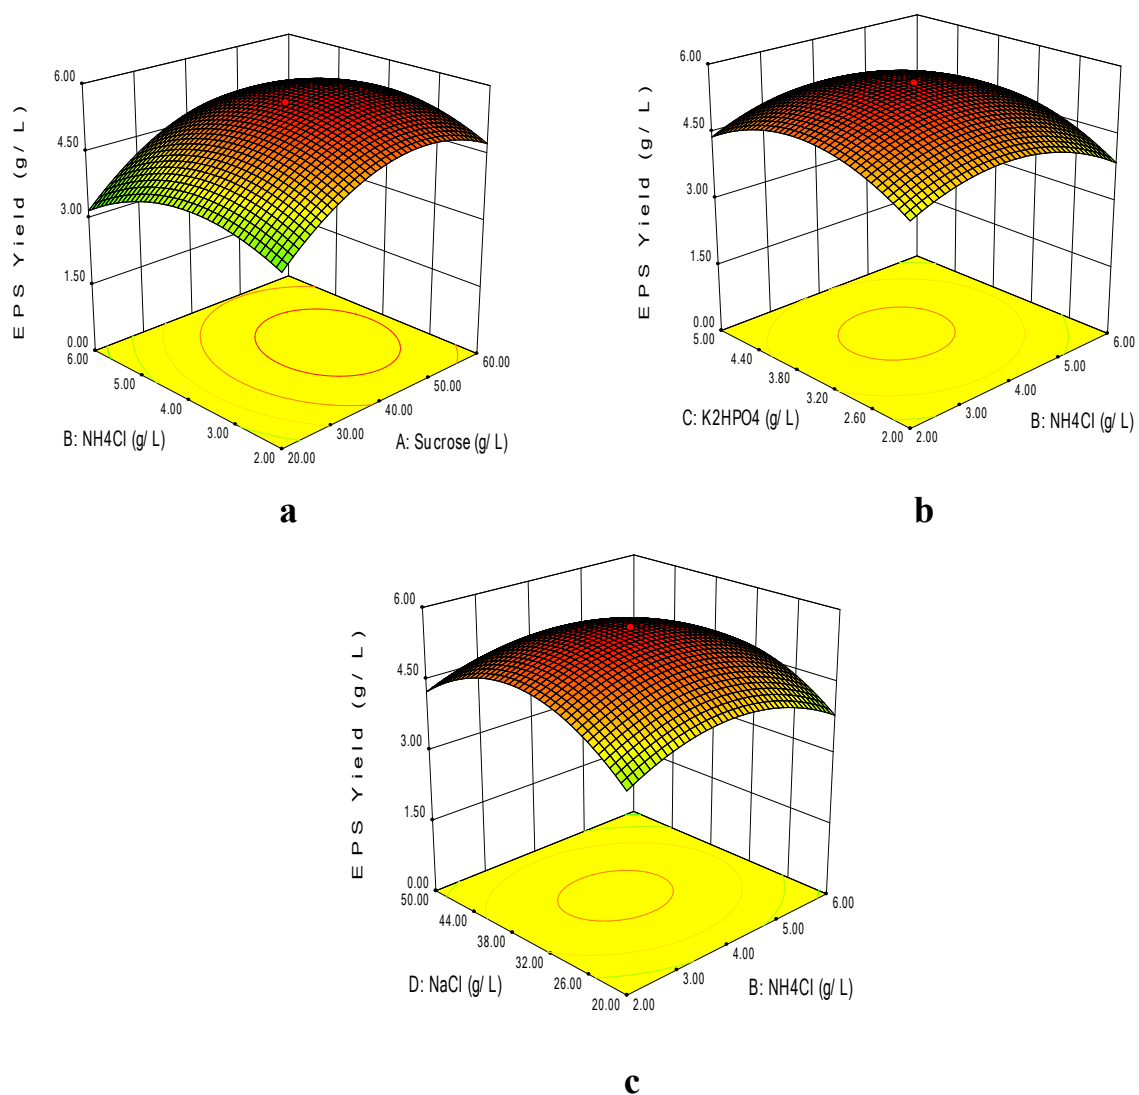

**Fig. S2** NMR spectrum of purified EPS produced by *B. megaterium* MSBN04. a)  $^1\text{H}$  NMR spectrum; b)  $^{13}\text{C}$  NMR spectrum.

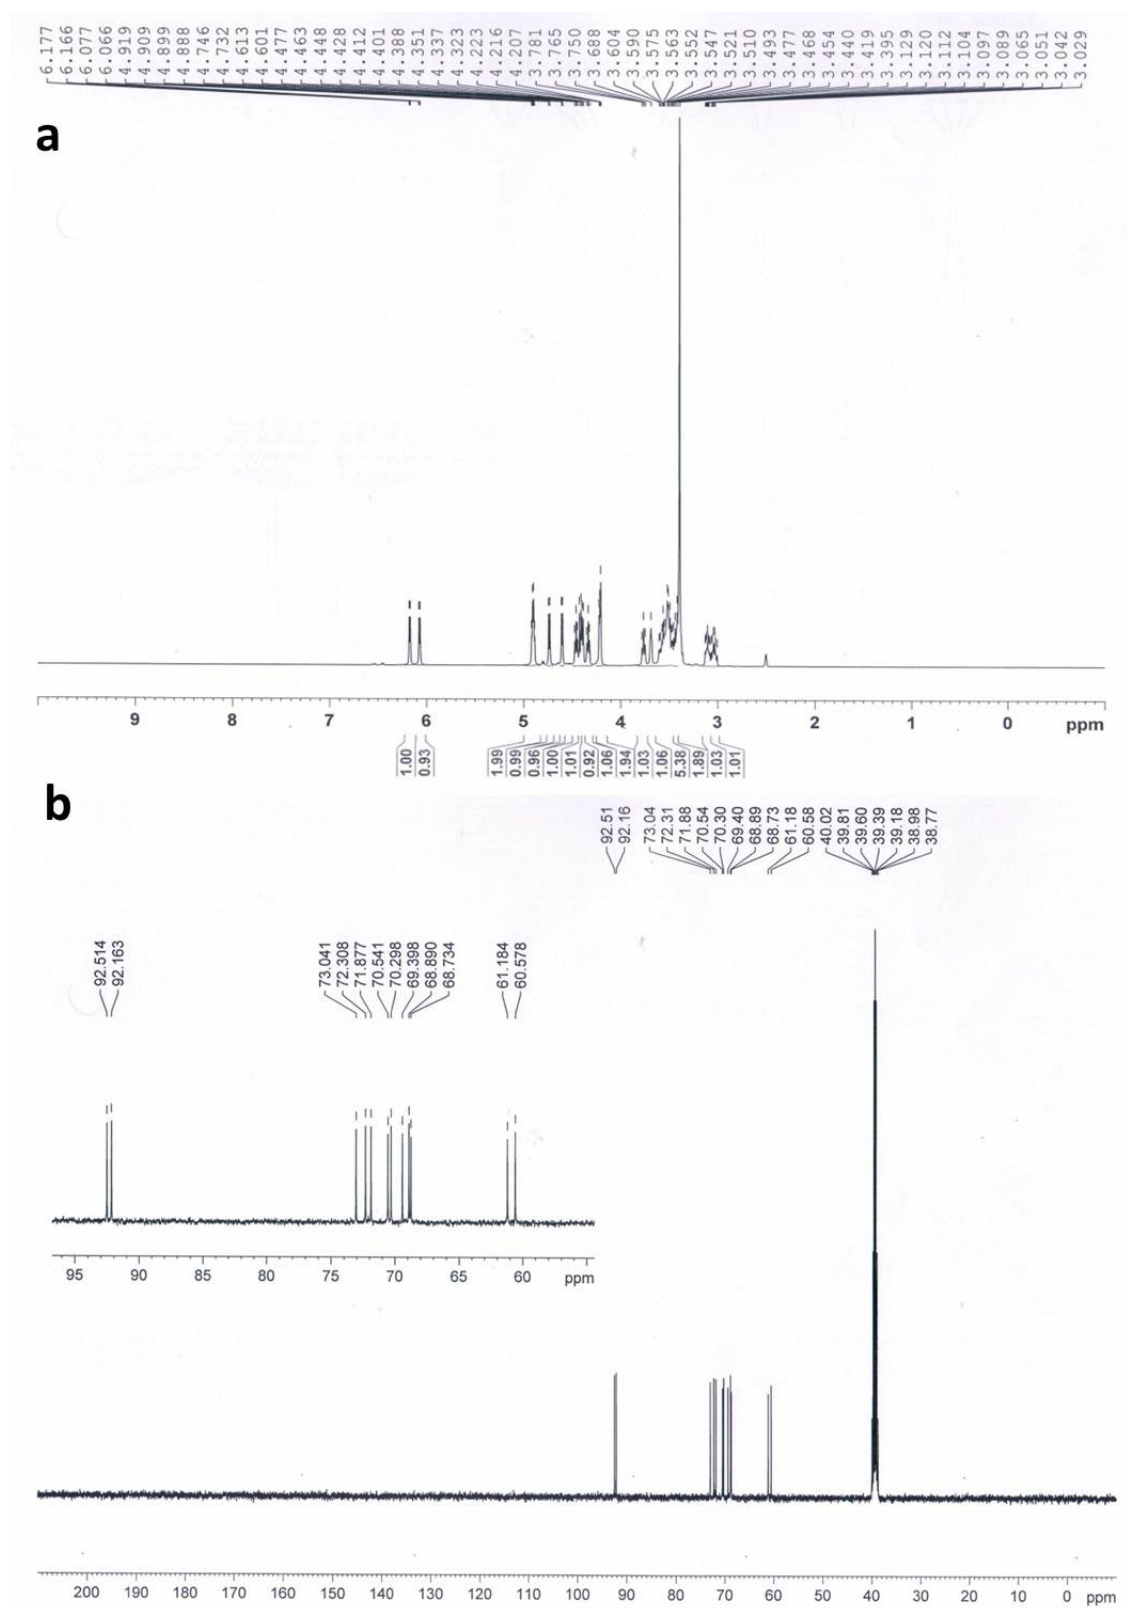

**Fig. S3** Optimization of gold precursor  $\text{HAuCl}_4$  for the synthesis of gold nanoparticles (GNPs) using EPS. The UV spectrum shows that the maximum synthesis at 1.0 mM  $\text{HAuCl}_4$ .

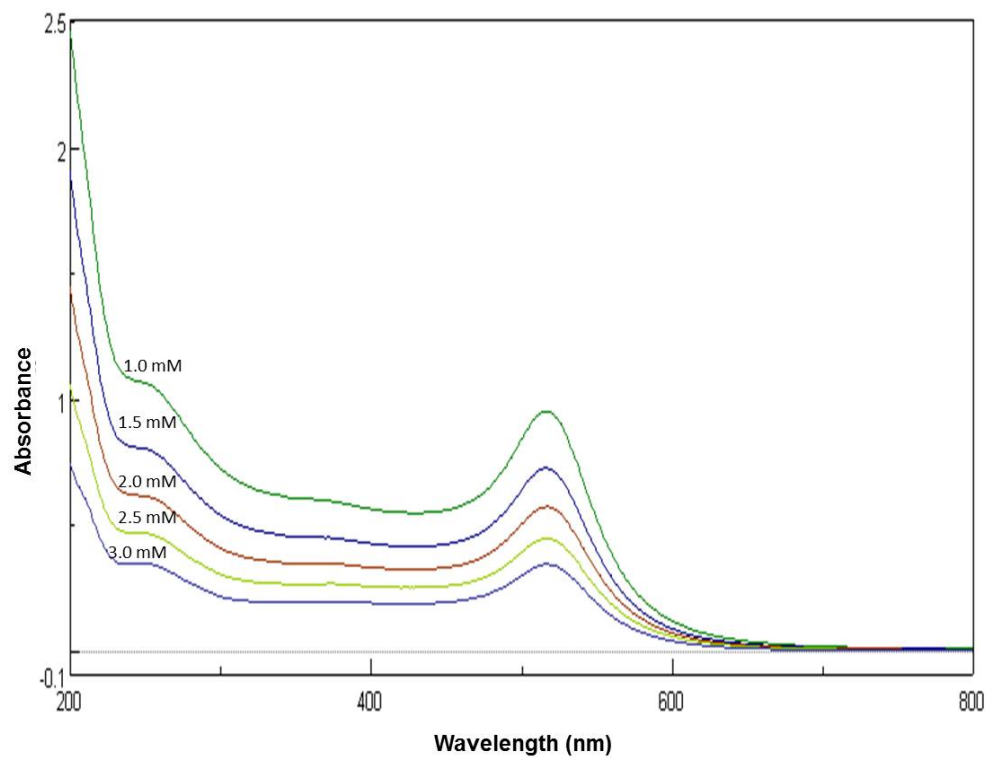

**Fig. S4** Zeta potential of EPS stabilized and encrusted gold nanoparticles.

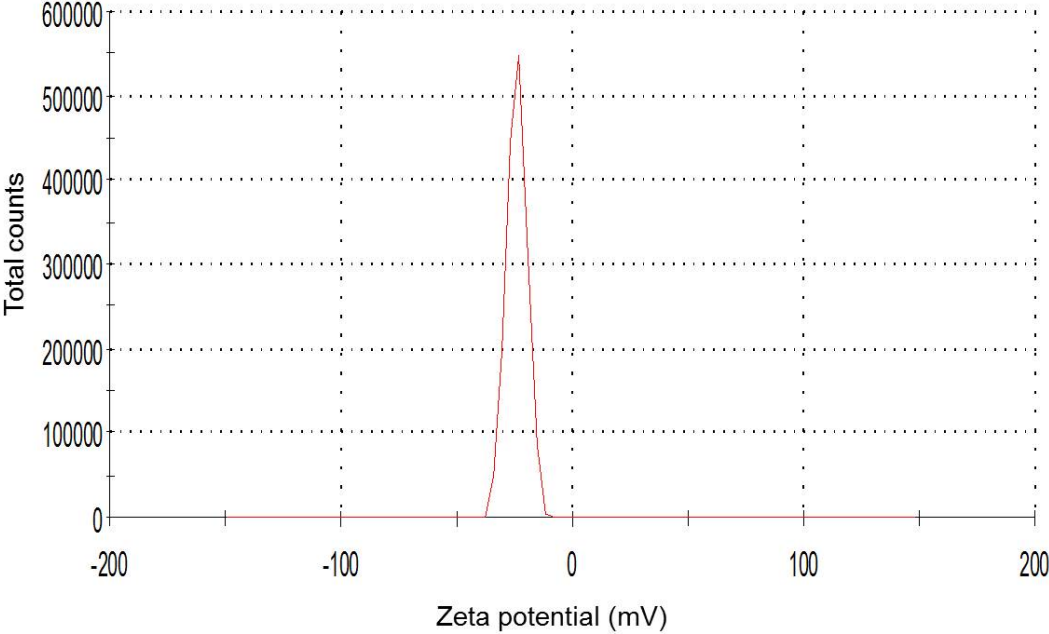

Supplement: c4ra01428f1.pdf [file c4ra01428f1.pdf]
